# Supplementary material
Source: publisher figshare collection journal article supplement (https://future-science-group.figshare.com/ndownloader/files/29065155)
Supplement: Supplementary file 1 [file 29065155]

Supplementary Table 2. HCRU for patients with GBM by MGMT testing status, methylation status

|  | **MGMT Methylation Testing Status** | | | | **MGMT Methylation Status** | | | |
| --- | --- | --- | --- | --- | --- | --- | --- | --- |
| **Variable** | **Overall** | **No** | **Yes** | **p-value** | **Overall** | **No** | **Yes** | **p-value** |
| Total patient count | 750 | 246 | 504 |  | 489 | 260 | 229 |  |
| **Hospitalizations** |  |  |  |  |  |  |  |  |
| Number of hospitalizations per patient |  |  |  | 0.6906 |  |  |  | 0.3718 |
| Patients with available data | 446 | 148 | 298 |  | 288 | 160 | 128 |  |
| Mean (SD) | 1.7 (1.0) | 1.7 (0.9) | 1.7 (1.1) |  | 1.8 (1.1) | 1.8 (1.0) | 1.7 (1.1) |  |
| Median (Min, Max) | 1.0 (1.0, 8.0) | 1.0 (1.0, 6.0) | 1.0 (1.0, 8.0) |  | 1.0 (1.0, 8.0) | 1.0 (1.0, 6.0) | 1.0 (1.0, 8.0) |  |
| Length of hospitalization (days) |  |  |  | 0.3135 |  |  |  | 0.1041 |
| Patients with available data | 370 | 116 | 254 |  | 246 | 138 | 108 |  |
| Mean (SD) | 6.7 (7.9) | 7.0 (8.3) | 6.6 (7.7) |  | 6.7 (7.8) | 5.9 (6.8) | 7.6 (8.9) |  |
| Median (Min, Max) | 4.0 (0.0, 68.0) | 5.0 (0.0, 68.0) | 4.0 (0.0, 51.0) |  | 4.0 (0.0, 51.0) | 4.0 (0.0, 43.0) | 4.0 (0.0, 51.0) |  |
| **Emergency department visits** |  |  |  |  |  |  |  |  |
| Number of ED visits per patient |  |  |  | 0.3710 |  |  |  | 0.9571 |
| Patients with available data | 365 | 114 | 251 |  | 244 | 136 | 108 |  |
| Mean (SD) | 1.6 (1.2) | 1.6 (1.5) | 1.6 (1.0) |  | 1.6 (1.0) | 1.7 (1.1) | 1.6 (0.9) |  |
| Median (Min, Max) | 1.0 (1.0, 13.0) | 1.0 (1.0, 13.0) | 1.0 (1.0, 7.0) |  | 1.0 (1.0, 7.0) | 1.0 (1.0, 7.0) | 1.0 (1.0, 7.0) |  |

Abbreviations: ED, emergency department; GBM, glioblastoma; HCRU, healthcare resource utilization; MGMT, O-methylguanine-DNA methyltransferase; NA, not available; SD, standard deviation
